# Supplementary material
Source: Springer Nature journal article supplement (https://www.springermedizin.de/resource/supplementary/12885_2011_2797_MOESM1_ESM.pdf/9462008)

## Males

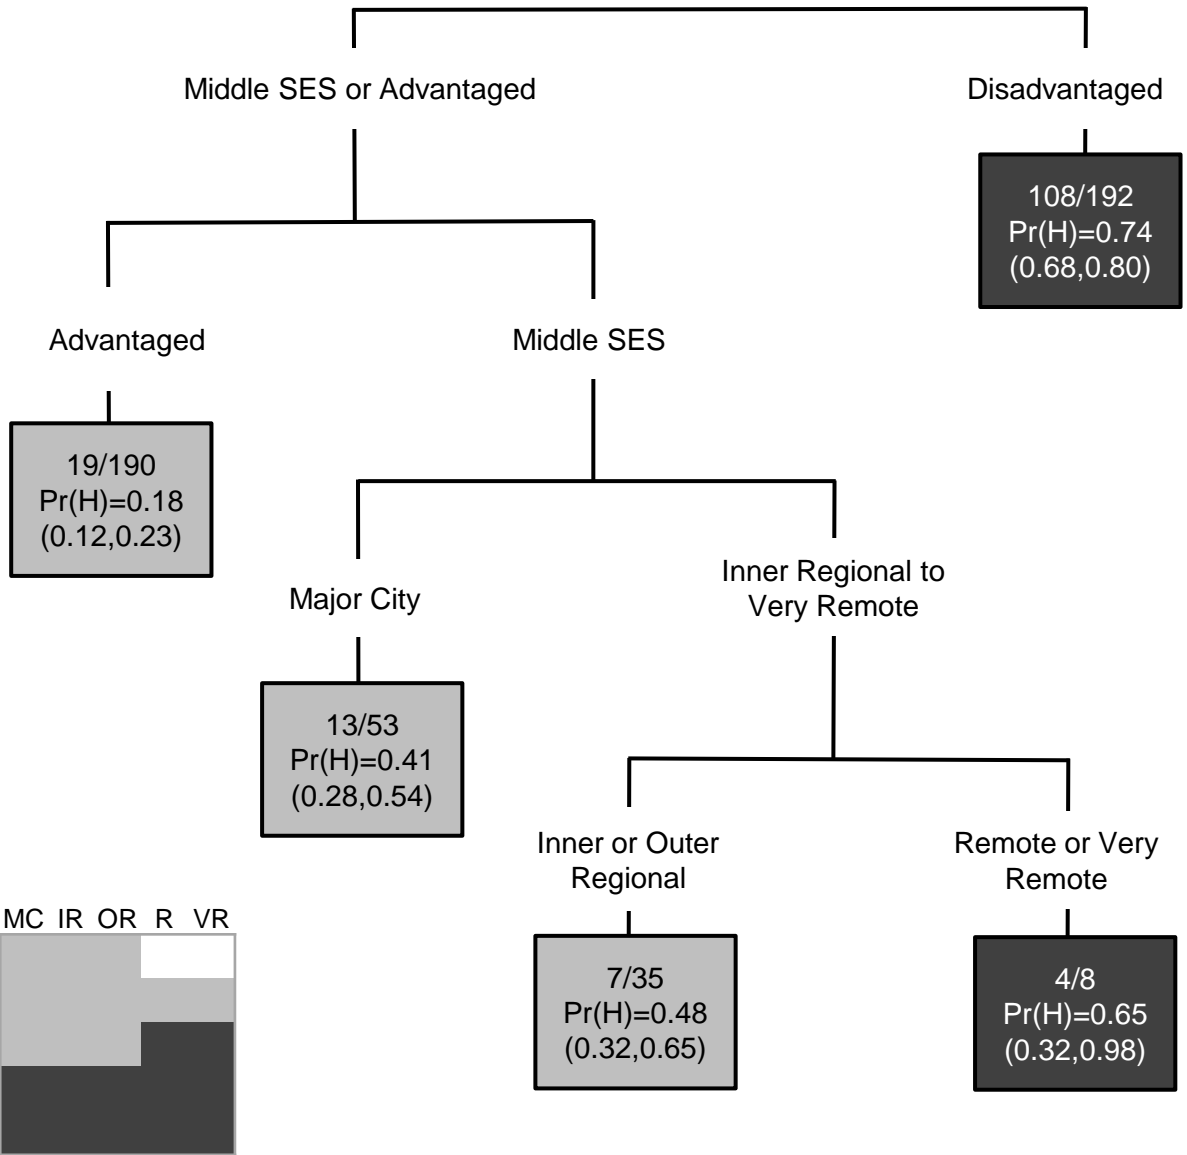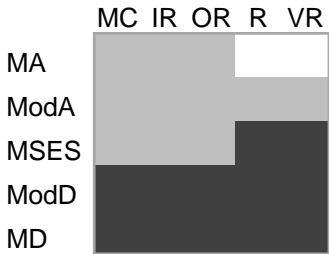

## Females

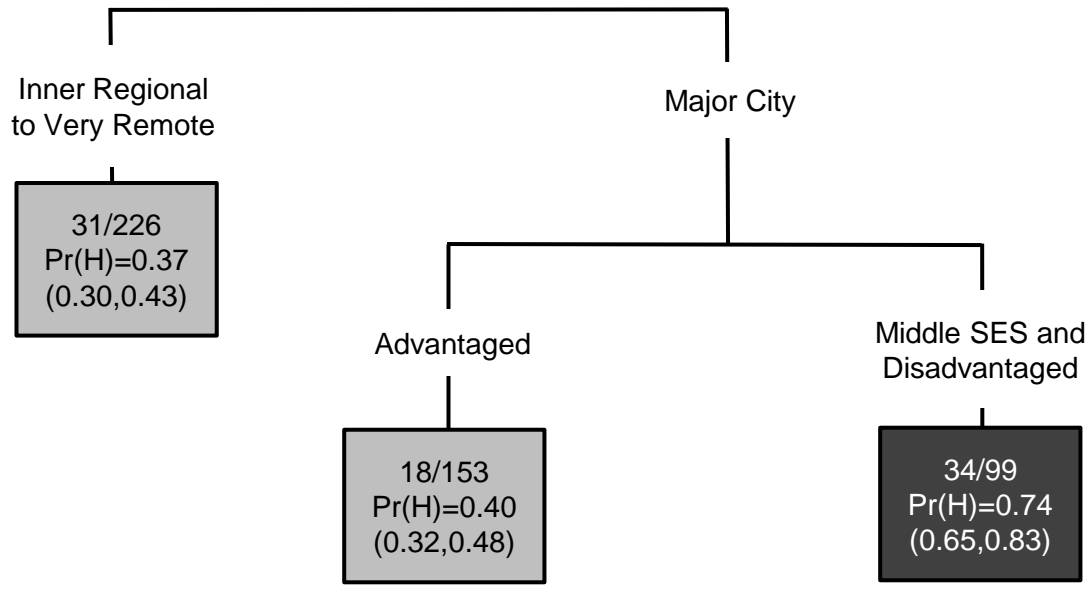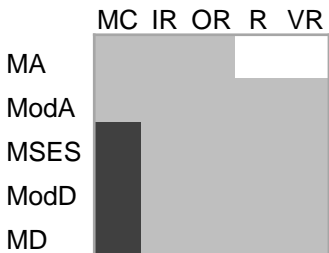

Supplement: MOESM1 [file 9462008]
